# Supplementary material
Source: Springer Nature journal article supplement (https://www.springermedizin.de/resource/supplementary/12916_2009_210_MOESM4_ESM.pdf/9599400)

Review : Clinical pathway and total hip and knee arthroplasty  
 Comparison: 02 Care Pathway vs standard care  
 Outcome: 01 Postoperative complications

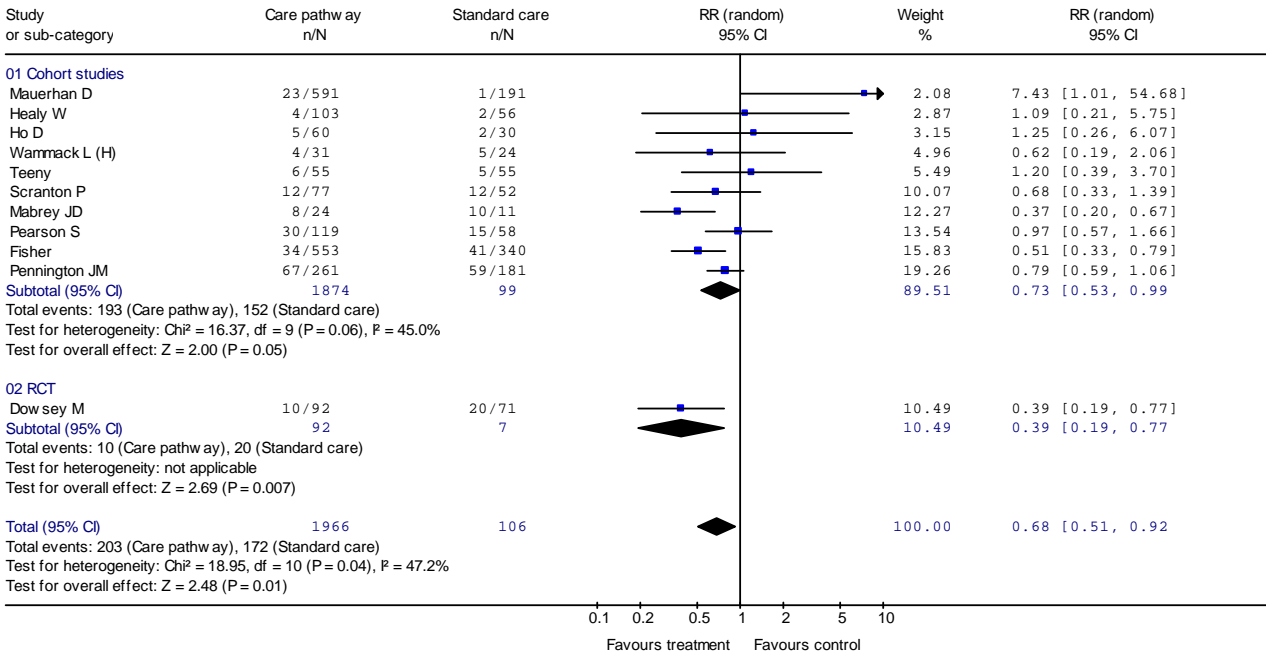

Supplement: MOESM4 [file 9599400]
